# Supplementary material for: The gradient of the reinforcement landscape influences sensorimotor learning
Source: PLOS journal article supplement (doi:10.1371/journal.pcbi.1006839), 2019-03-04
Supplement: S1 (10.1371/journal.pcbi.1006839.s001) [file journal.pcbi.1006839.s001]

## S1 DATA

### *Cutoff Criterion Used to Separate Learners and Non-Learners*

For each experimental group in *Experiment 1*, there were two distinct subpopulations of participants: those who changed their reaching direction during the experimental trials and ascended the reinforcement landscape (learners) and those who did not change their reaching behaviour during the experimental trials (non-learners). For each participant, we determined their average reach angle during the last 100 trials of the experimental trials. Plotting a histogram of participant final positions revealed a bimodal distribution, representing the two subpopulations of learners and non-learners (see **Fig. S1**).

We found that a *z-score* of 1.0 was a suitable cutoff for separating the learners from the non-learners. That is, participants whose final reach position had a *z-score*  $\geq 1.0$  were classified as learners, and those whose final reach position had a *z-score*  $< 1.0$  were classified as non-learners. Although the non-learners affect the average final reach angle of their respective groups, they did not bias the time-constant ( $\lambda$ ) of the exponential curves. In other words, the non-learners do not affect the time taken to reach asymptotic behaviour. Crucially, those experiencing a steep or shallow reinforcement landscape had significantly different learning rates, irrespective of whether non-learners were ( $p = 0.021$ ) or were not ( $p = 0.012$ ) included in the comparison.

Moreover, the same cutoff was used in *Experiment 2* to separate steep learners, shallow learners and non-learners. For both the steep clockwise and steep counter-clockwise reinforcement landscapes, participants that moved at least 1.0 *z-score* away from baseline in the direction of the steep slope were classified as steep learners. Participants that moved at least 1.0 *z-score* away from baseline in the direction of the shallow slope were classified as shallow learners. Those who stayed within  $\pm 1.0$  *z-score* relative to baseline behaviour were classified as non-learners.
