# Supplementary material for: The gradient of the reinforcement landscape influences sensorimotor learning
Source: PLOS journal article supplement (doi:10.1371/journal.pcbi.1006839), 2019-03-04
Supplement: S4 (10.1371/journal.pcbi.1006839.s004) [file journal.pcbi.1006839.s004]

## S4 DATA

### *Influence of Initial Reward Probability on Learning Rate*

Here we performed a simulation with our learning model ( $n = 100,000$ ) to explore the influence of initial reward probability on the rate of learning. Specifically, we examined the learning rate when experiencing a shallow landscape with an initial reward probability ( $z\text{-score} = 0$ ) set to 33.3% (**Fig. 1B**) or 66.7%. Shifting the initial reward probability up to 66.7% resulted in a maximal reward probability of 100.0%. We found that changing the initial reward probability from 33.3% to 66.7% resulted in a marginally slower learning rate (i.e.,  $\lambda$  changed from 49.6 to 55.9). These marginal learning rate changes can be attributed to a slightly lower frequency of additional exploratory variability. Nevertheless, our simulations find that a steep landscape results in faster learning ( $\lambda = 28.0$ ; **see Results**) compared to a shallow landscape, irrespective of the latter's initial reward probability.
