# Supplementary material for: The gradient of the reinforcement landscape influences sensorimotor learning
Source: PLOS journal article supplement (doi:10.1371/journal.pcbi.1006839), 2019-03-04

**A**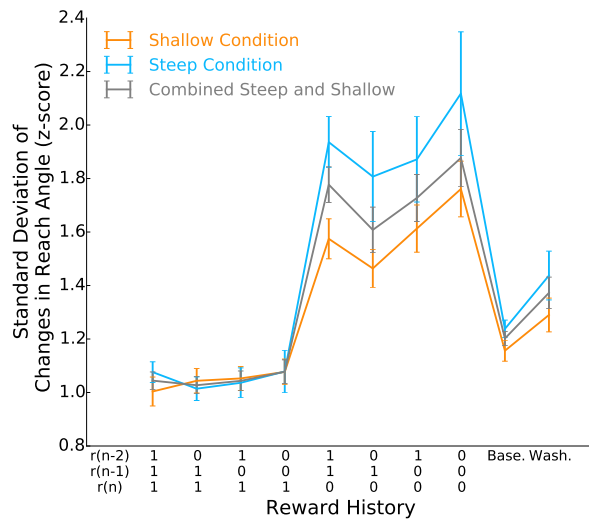**B**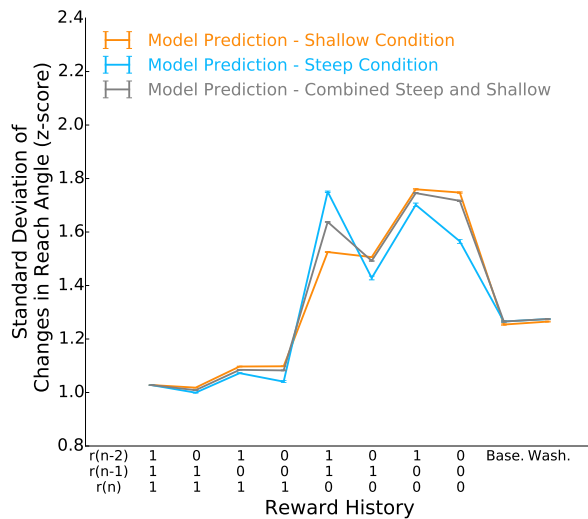**C**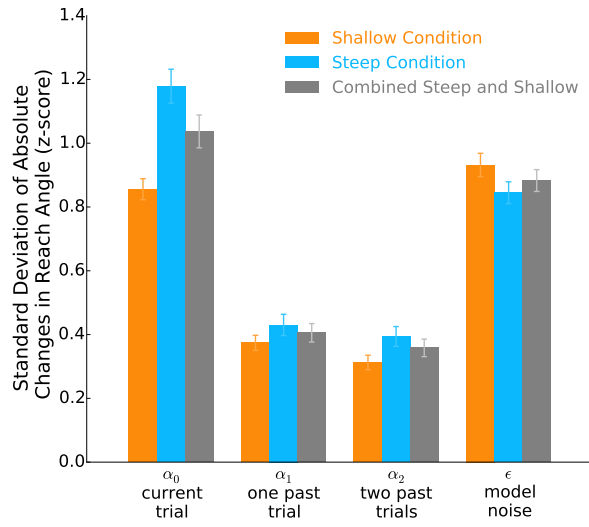**D**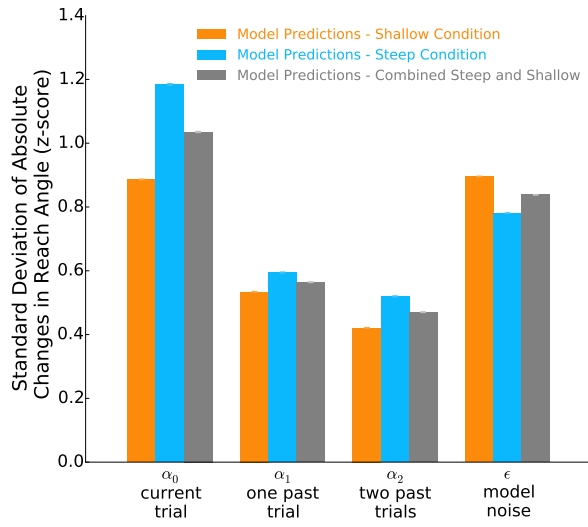

Supplement: S6 (10.1371/journal.pcbi.1006839.s006) [file journal.pcbi.1006839.s006]
